# Supplementary material for: Antiapolipoprotein A‐1 Autoantibody Positivity Is Associated with Threatened Abortion
Source: Hindawi journal article supplement (doi:10.1155/2020/9309121), 2020-01-01

**Supplementary table 1. Maternal adverse outcomes other than threatened abortion of the overall cohort.**

---

| <b>Pregnancy and delivery characteristics</b> |               |
|-----------------------------------------------|---------------|
| Gestational hypertension, n (%)               | 4 (1.1)       |
| Gestational age at delivery, days             | 275 [270-282] |
| Premature delivery, n (%)                     | 22 (6.6)      |
| Cesarean delivery, n (%)                      | 173 (50.7)    |
| Urgent Cesarean delivery, n (%)               | 38 (11.1)     |
| Overall maternal adverse outcomes, n (%)      | 184 (49.6)    |

---

Data are presented as a number and (%) of all cases or as median and [interquartile range].

**Supplementary table 2. Maternal adverse outcomes other than threatened abortion according to positivity/negativity for ApoA-1 IgG autoantibodies.**

|                                                      | <b>Anti-ApoA-1 IgG<br/>negative (n=340)</b> | <b>Anti-ApoA-1 IgG<br/>positive (n=31)</b> | <b><i>p</i></b> |
|------------------------------------------------------|---------------------------------------------|--------------------------------------------|-----------------|
| <b><u>Pregnancy and delivery characteristics</u></b> |                                             |                                            |                 |
| Gestational hypertension, n (%)                      | 4 (1.2)                                     | 0                                          | 1.000           |
| Gestational age at delivery, days, n (%)             | 275 [270-282]                               | 275 [270-282]                              | 0.956           |
| Premature delivery, n (%)                            | 22 (7.2)                                    | 0                                          | 0.237           |
| Spontaneous delivery, n (%)                          | 129 (41.2)                                  | 9 (32.1)                                   | 0.424           |
| Induced delivery, n (%)                              | 22 (7.0)                                    | 3 (10.7)                                   | 0.446           |
| Cesarean delivery, n (%)                             | 157 (50.2)                                  | 16 (57.1)                                  | 0.556           |
| Urgent Cesarean delivery, n (%)                      | 33 (10.5)                                   | 5 (17.9)                                   | 0.220           |
| Overall maternal adverse outcomes, n (%)             | 167 (49.1)                                  | 17 (54.8)                                  | 0.578           |

Data are presented as a number and (%) of all cases or as median and [interquartile range].

*p*-values have been calculated according to Fisher exact test or Mann-Whitney *U* test, when appropriate, and referred to as comparison between study groups.

Anti-ApoA-1 IgG: Apolipoprotein A-1 immunoglobulin G autoantibody.

**Supplementary table 3. Maternal adverse outcomes other than threatened abortion according to positivity/negativity for Ac-terAA1 IgG autoantibodies.**

|                                               | <b>Ac-terAA1 IgG<br/>negative (n=289)</b> | <b>Ac-terAA1 IgG<br/>positive (n=82)</b> | <b>p</b> |
|-----------------------------------------------|-------------------------------------------|------------------------------------------|----------|
| <b>Pregnancy and delivery characteristics</b> |                                           |                                          |          |
| Gestational hypertension, n (%)               | 2 (0.7)                                   | 2 (2.4)                                  | 0.213    |
| Gestational age at delivery, days             | 276 [270-283]                             | 274 [269-282]                            | 0.266    |
| Premature delivery, n (%)                     | 18 (6.9)                                  | 4 (5.6)                                  | 1.000    |
| Spontaneous delivery, n (%)                   | 103 (38.6)                                | 35 (47.3)                                | 0.183    |
| Induced delivery, n (%)                       | 19 (7.1)                                  | 6 (8.1)                                  | 0.802    |
| Cesarian delivery, n (%)                      | 141 (52.8)                                | 32 (43.2)                                | 0.151    |
| Urgent Cesarian delivery, n (%)               | 33 (12.4)                                 | 5 (6.8)                                  | 0.214    |
| Overall maternal adverse outcomes, n (%)      | 146 (50.5)                                | 38 (46.3)                                | 0.533    |

Data are presented as a number and (%) of all cases or as median and [interquartile range].

*p*-values have been calculated according to Fisher exact test or Mann-Whitney *U* test, when appropriate, and referred to as comparison between study groups.

Ac-terAA1 IgG: Ac-terAA1 IgG: anti-c-terminus ApoA-1 autoantibody.

**Supplementary figure 1.** Spearman's rank correlation between anti-ApoA-1 and anti-Ac-terAA1 IgG.

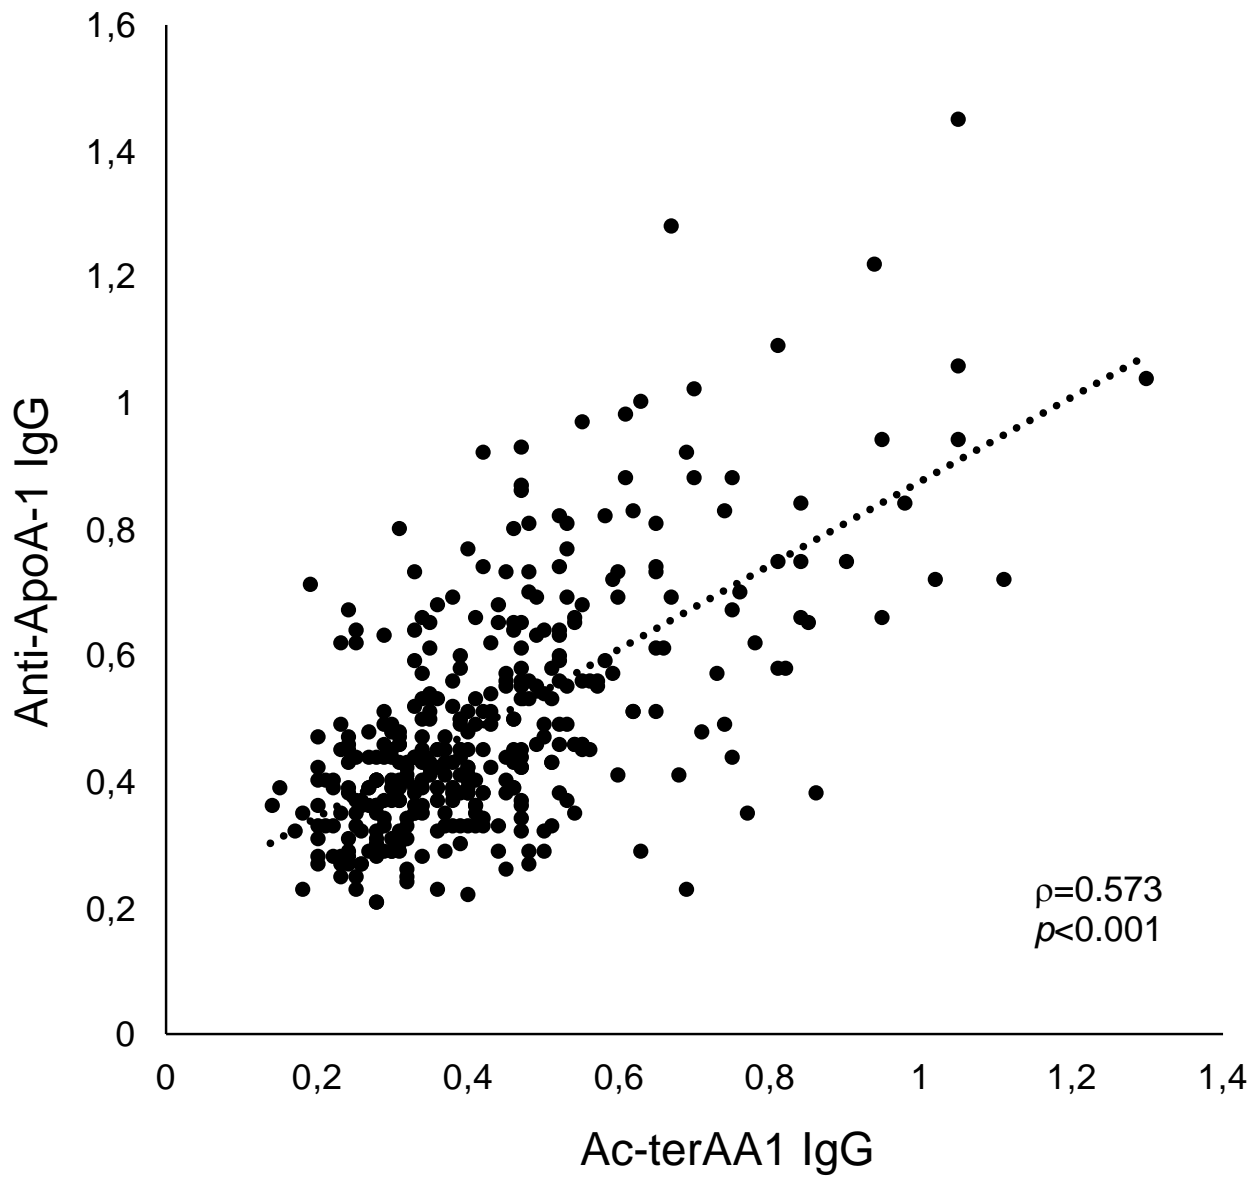

Supplement: f1 [file 9309121.f1.pdf]
